# Supplementary material for: Supplementation of a Multi-Carbohydrase and Phytase Complex in Diets Regardless of Nutritional Levels, Improved Nutrients Digestibility, Growth Performance, and Bone Mineralization of Growing–Finishing Pigs
Source: MDPI journal article supplement (doi:10.3390/ani13091557), 2023-05-06
Supplement: s1 [file s1]

**Supplemental Table S1.** Ingredients and compositions of diets for 7-11 kg and 11-25 kg piglets.

| Ingredients, %                   | 7-11 kg | 11-25 kg | Composition                                      | 7-11 kg | 11-25 kg |
|----------------------------------|---------|----------|--------------------------------------------------|---------|----------|
| Corn                             | 40.423  | 47.091   | Digestible energy, Kcal/kg                       | 3557    | 3479     |
| Whey powder                      | 25.000  | 20.000   | Metabolizable energy, Kcal/kg                    | 3393    | 3336     |
| Soybean meal, dehulled, extruded | 16.200  | 19.000   | Net engery, Kcal/kg                              | 2448    | 2412     |
| Fish meal                        | 5.000   | 2.500    | Crude protein, %                                 | 20.990  | 18.250   |
| Porcine plasma                   | 5.000   | 2.500    | Ether extract, %                                 | 4.170   | 3.500    |
| Heat-treated soybeans            | 5.000   |          | Ash, %                                           | 3.070   | 2.680    |
| Wheat bran                       | 0.900   | 5.400    | Crude fibre, %                                   | 1.730   | 2.310    |
| Soybean hull                     | 0.300   | 0.900    | Digestible lysine, %                             | 1.350   | 1.230    |
| Lysine (78.8%)                   | 0.214   | 0.391    | Digestible methionine %                          | 0.460   | 0.410    |
| DL-methionine                    | 0.120   | 0.141    | Digestible methionine+cysteine, %                | 0.740   | 0.680    |
| Threonine                        | 0.019   | 0.100    | Digestible threonine, %                          | 0.790   | 0.730    |
| Valine                           |         | 0.083    | Digestible tryptophan, %                         | 0.240   | 0.200    |
| Monocalcium phosphate            | 0.144   | 0.254    | Digestible isoleucine, %                         | 0.750   | 0.670    |
| Limestone                        | 0.715   | 0.810    | Digestible valine, %                             | 0.860   | 0.780    |
| Sodium chloride                  | 0.350   | 0.300    | Digestible arginine, %                           | 1.230   | 1.100    |
| Sodium sulfate, decahydrate      |         | 0.100    | Digestible histidine, %                          | 0.490   | 0.430    |
| Mineral premix <sup>1</sup>      | 0.090   | 0.090    | Digestible leucine, %                            | 1.570   | 1.390    |
| Vitamin premix <sup>2</sup>      | 0.035   | 0.030    | Digestible phenylalanine, %                      | 0.880   | 0.770    |
| Choline chloride (50%)           | 0.100   | 0.100    | Digestible<br>phenylalanine+tyrosine, %          | 1.450   | 1.250    |
| Ethoxyquin (30%)                 | 0.030   | 0.030    | Calcium, %                                       | 0.800   | 0.700    |
| Anti-mould additive              | 0.050   | 0.050    | Total phosphorus, %                              | 0.650   | 0.600    |
| Flavour                          | 0.050   | 0.050    | Standard total tract digestible-<br>phosphorus % | 0.460   | 0.390    |

|                                          |         |         |
|------------------------------------------|---------|---------|
| ZnO                                      | 0.200   |         |
| Antibiotic growth promoters <sup>3</sup> | 0.060   | 0.060   |
| Total                                    | 100.000 | 100.000 |

---

<sup>1</sup>Provided per kg of diet: copper, 200, 100 mg; iron, 100, 100 mg; manganese, 4, 3 mg; zinc, 100, 80 mg; iodine, 0.14, 0.14 mg; selenium, 0.30, 0.25mg, for 7-11 kg and 11-25 kg phases, respectively.

<sup>2</sup>Provided per kg of diet: vitamin A, 11375, 9750 IU; vitamin D<sub>3</sub>, 3500, 3000 IU; vitamin E, 28, 24 mg; menadione, 3.5, 3 mg; thiamine, 3.5, 3 mg; riboflavin, 8.75, 7.5 mg; niacin, 35, 30 mg; d-panthothenic acid, 17.5, 15 mg; vitamin B6, 4.2, 3.6 mg; vitamin B12, 42, 36 µg; d-biotin, 175, 150 µg; folic acid, 1.75, 1.5 mg, for 7-11 kg and 11-25 kg phases, respectively.

<sup>3</sup>Provided per kg of diet: 12 mg of flavomycin and 75 mg of chlortetracycline via 12% of flavomycin premix and 15% of chlortetracycline premix, respectively.

**Supplemental Table S2.** The diets of descriptions.

| Diet names |                                                                                                         | Descriptions           |
|------------|---------------------------------------------------------------------------------------------------------|------------------------|
| PC         |                                                                                                         | Nutrient-adequate diet |
| NC1        | PC reduced in NE, dig. AA, SID P, and Ca by -3%, -3%, and -0.080% unit, and -0.071% unit, respectively. |                        |
| NC2        | PC reduced in NE, dig. AA, SID P, and Ca by -5%, -5%, and -0.080% unit, and -0.071% unit, respectively. |                        |
| PC + MCPC  | PC supplemented with multi-enzyme at 100 g/ metric ton of feed                                          |                        |
| NC1 + MCPC | NC1 supplemented with multi-enzyme at 100 g/ metric ton of feed                                         |                        |
| NC2 + MCPC | NC2 supplemented with multi-enzyme at 100 g/ metric ton of feed                                         |                        |

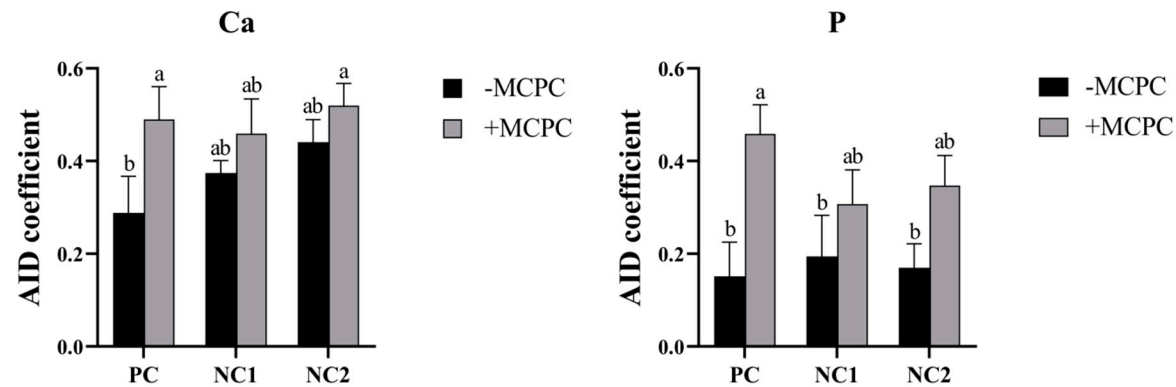

**Supplemental Figure S1.** Effects of supplemental multi-enzyme (MCPC) in diets differing in nutritional levels on apparent ileal digestibility (AID) coefficients of Ca and P of growing-finishing pigs.

PC = positive control; NC1 = negative control 1; NC2 = negative control 2; MCPC = multi-carbohydase and phytase complex.

<sup>a,b,c</sup> Means with no common letters differ at  $P < 0.05$ .

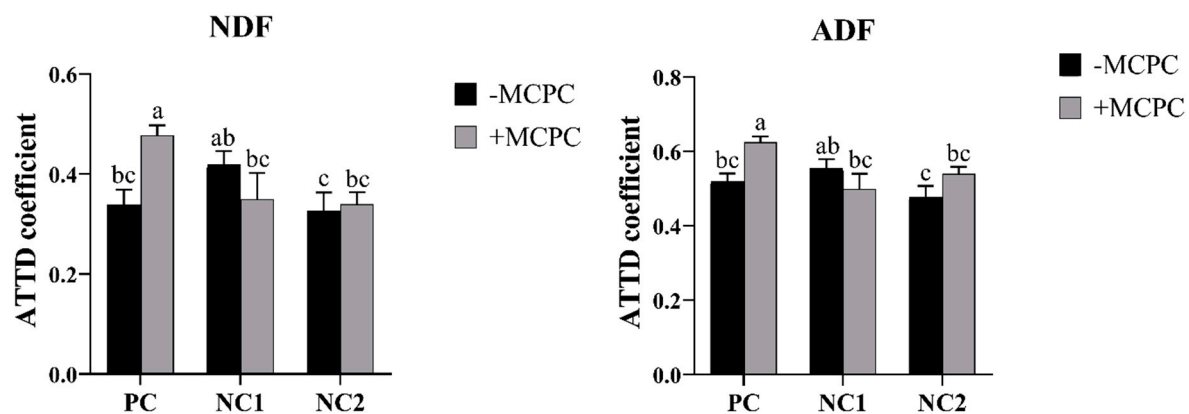

**Supplemental Figure S2.** Effects of supplemental multi-enzyme (MCPC) in diets differing in nutritional levels on apparent total-tract digestibility (ATTD) coefficients of neutral detergent fibre (NDF) and acid detergent fiber (ADF) of growing-finishing pigs. PC = positive control; NC1 = negative control 1; NC2 = negative control 2; MCPC = multi-carbohydrase and phytase complex.

a,b,c Means with no common letters differ at  $P < 0.05$ .
